# Supplementary material
Source: publisher figshare collection journal article supplement (https://acs.figshare.com/ndownloader/files/5335153)
Supplement: Supplementary file 1 [file 5335153]

 
data_ds 
 
_audit_creation_method            SHELXL-97 
_chemical_name_systematic 
; 
 ? 
; 
_chemical_name_common             ? 
_chemical_melting_point           ? 
_chemical_formula_moiety          ? 
_chemical_formula_sum 
 'C30 H24 Ag Cl3 Mo8 N6 O26' 
_chemical_formula_weight          1866.29 
 
loop_ 
 _atom_type_symbol 
 _atom_type_description 
 _atom_type_scat_dispersion_real 
 _atom_type_scat_dispersion_imag 
 _atom_type_scat_source 
 'C'  'C'   0.0033   0.0016 
 'International Tables Vol C Tables 4.2.6.8 and 6.1.1.4' 
 'H'  'H'   0.0000   0.0000 
 'International Tables Vol C Tables 4.2.6.8 and 6.1.1.4' 
 'Mo'  'Mo'  -1.6832   0.6857 
 'International Tables Vol C Tables 4.2.6.8 and 6.1.1.4' 
 'N'  'N'   0.0061   0.0033 
 'International Tables Vol C Tables 4.2.6.8 and 6.1.1.4' 
 'O'  'O'   0.0106   0.0060 
 'International Tables Vol C Tables 4.2.6.8 and 6.1.1.4' 
 'Cl'  'Cl'   0.1484   0.1585 
 'International Tables Vol C Tables 4.2.6.8 and 6.1.1.4' 
 'Ag'  'Ag'  -0.8971   1.1015 
 'International Tables Vol C Tables 4.2.6.8 and 6.1.1.4' 
 
_symmetry_cell_setting            Triclinic
_symmetry_space_group_name_H-M    P-1
 
loop_ 
 _symmetry_equiv_pos_as_xyz 
 'x, y, z' 
 '-x, -y, -z' 
 
_cell_length_a                    9.6480(19) 
_cell_length_b                    13.219(3) 
_cell_length_c                    18.633(4) 
_cell_angle_alpha                 89.14(3) 
_cell_angle_beta                  86.43(3) 
_cell_angle_gamma                 82.22(3) 
_cell_volume                      2349.9(8) 
_cell_formula_units_Z             2 
_cell_measurement_temperature     293(2) 
_cell_measurement_reflns_used     ? 
_cell_measurement_theta_min       3.05 
_cell_measurement_theta_max       27.48 
 
_exptl_crystal_description        Block
_exptl_crystal_colour             Yellow
_exptl_crystal_size_max           0.20 
_exptl_crystal_size_mid           0.15 
_exptl_crystal_size_min           0.11 
_exptl_crystal_density_meas       none
_exptl_crystal_density_diffrn     2.638 
_exptl_crystal_density_method     'not measured' 
_exptl_crystal_F_000              1776 
_exptl_absorpt_coefficient_mu     2.733 
_exptl_absorpt_correction_type    Empirical 
_exptl_absorpt_correction_T_min   0.618
_exptl_absorpt_correction_T_max   0.740 
_exptl_absorpt_process_details    'ABSCOR by T.Higashi 8 March, 1995' 
 
_exptl_special_details 
; 
 ? 
; 
 
_diffrn_ambient_temperature       293(2) 
_diffrn_radiation_wavelength      0.71073 
_diffrn_radiation_type            MoK\a 
_diffrn_radiation_source          'fine-focus sealed tube' 
_diffrn_radiation_monochromator   graphite 
_diffrn_measurement_device_type   'CCD area detector'
_diffrn_measurement_method        'phi and omega scans' 
_diffrn_detector_area_resol_mean  0.01 
_diffrn_standards_number          ? 
_diffrn_standards_interval_count  ? 
_diffrn_standards_interval_time   ? 
_diffrn_standards_decay_%         ? 
_diffrn_reflns_number             21149 
_diffrn_reflns_av_R_equivalents   0.0517 
_diffrn_reflns_av_sigmaI/netI     0.1052 
_diffrn_reflns_limit_h_min        -12 
_diffrn_reflns_limit_h_max        12 
_diffrn_reflns_limit_k_min        -16 
_diffrn_reflns_limit_k_max        17 
_diffrn_reflns_limit_l_min        -24 
_diffrn_reflns_limit_l_max        24 
_diffrn_reflns_theta_min          3.05 
_diffrn_reflns_theta_max          27.48 
_reflns_number_total              9998 
_reflns_number_gt                 5559 
_reflns_threshold_expression      >2sigma(I) 
 
_computing_data_collection        'Bruker SMART' 
_computing_cell_refinement        'Bruker SMART' 
_computing_data_reduction         'Bruker SAINT' 
_computing_structure_solution     'SHELXS-97 (Sheldrick, 1990)' 
_computing_structure_refinement   'SHELXL-97 (Sheldrick, 1997)' 
_computing_molecular_graphics     'Bruker SHELXTL'
_computing_publication_material   'Bruker SHELXTL' 
 
_refine_special_details 
; 
 Refinement of F^2^ against ALL reflections.  The weighted R-factor wR and 
 goodness of fit S are based on F^2^, conventional R-factors R are based 
 on F, with F set to zero for negative F^2^. The threshold expression of 
 F^2^ > 2sigma(F^2^) is used only for calculating R-factors(gt) etc. and is 
 not relevant to the choice of reflections for refinement.  R-factors based 
 on F^2^ are statistically about twice as large as those based on F, and R- 
 factors based on ALL data will be even larger. 
; 
 
_refine_ls_structure_factor_coef  Fsqd  
_refine_ls_matrix_type            full 
_refine_ls_weighting_scheme       calc  
_refine_ls_weighting_details 
 'calc w=1/[\s^2^(Fo^2^)+(0.0740P)^2^+0.0000P] where P=(Fo^2^+2Fc^2^)/3' 
_atom_sites_solution_primary      direct 
_atom_sites_solution_secondary    difmap 
_atom_sites_solution_hydrogens    geom 
_refine_ls_hydrogen_treatment     mixed 
_refine_ls_extinction_method      none 
_refine_ls_extinction_coef        ? 
_refine_ls_number_reflns          9998 
_refine_ls_number_parameters      675 
_refine_ls_number_restraints      2 
_refine_ls_R_factor_all           0.0973 
_refine_ls_R_factor_gt            0.0588 
_refine_ls_wR_factor_ref          0.1434 
_refine_ls_wR_factor_gt           0.1344 
_refine_ls_goodness_of_fit_ref    0.918 
_refine_ls_restrained_S_all       0.918 
_refine_ls_shift/su_max           0.001 
_refine_ls_shift/su_mean          0.000 
 
loop_ 
 _atom_site_label 
 _atom_site_type_symbol 
 _atom_site_fract_x 
 _atom_site_fract_y 
 _atom_site_fract_z 
 _atom_site_U_iso_or_equiv 
 _atom_site_adp_type 
 _atom_site_occupancy 
 _atom_site_symmetry_multiplicity 
 _atom_site_calc_flag 
 _atom_site_refinement_flags 
 _atom_site_disorder_assembly 
 _atom_site_disorder_group 
Mo1 Mo -0.26086(8) 0.84333(5) 0.82542(4) 0.01338(16) Uani 1 1 d . . . 
Mo2 Mo -0.06118(8) 0.62029(5) 0.65077(4) 0.01629(18) Uani 1 1 d . . . 
Mo3 Mo -0.17506(8) 0.86629(5) 0.65843(4) 0.01596(17) Uani 1 1 d . . . 
Mo4 Mo -0.14237(7) 0.60202(5) 0.82118(4) 0.01456(17) Uani 1 1 d . . . 
Mo5 Mo -0.61010(8) 0.90986(5) 0.87588(4) 0.01812(18) Uani 1 1 d . . . 
Mo6 Mo -0.40877(7) 0.68993(5) 0.70216(4) 0.01293(16) Uani 1 1 d . . . 
Mo7 Mo -0.49743(7) 0.66487(5) 0.86790(4) 0.01479(17) Uani 1 1 d . . . 
Mo8 Mo -0.52504(7) 0.93082(5) 0.70550(4) 0.01752(17) Uani 1 1 d . . . 
Ag1 Ag 0.16703(12) 0.76661(8) 0.76105(7) 0.0618(3) Uani 1 1 d . . . 
O1 O -0.6561(7) 0.9916(5) 0.9443(4) 0.0317(17) Uani 1 1 d . . . 
O2 O 0.0907(6) 0.6545(4) 0.6774(3) 0.0254(15) Uani 1 1 d . . . 
O3 O -0.2066(7) 0.9516(5) 0.5909(4) 0.0300(16) Uani 1 1 d . . . 
O4 O -0.1243(6) 0.7475(4) 0.5998(3) 0.0215(14) Uani 1 1 d . . . 
O5 O -0.0135(7) 0.5364(5) 0.5828(3) 0.0292(16) Uani 1 1 d . . . 
O6 O -0.0199(6) 0.8849(4) 0.6885(4) 0.0257(15) Uani 1 1 d . . . 
O7 O 0.0137(6) 0.6414(4) 0.8372(3) 0.0251(14) Uani 1 1 d . . . 
O8 O -0.2963(6) 0.9299(4) 0.7409(3) 0.0152(12) Uani 1 1 d . . . 
O9 O -0.0999(6) 0.5348(4) 0.7321(3) 0.0180(13) Uani 1 1 d . . . 
O10 O -0.2000(5) 0.7347(4) 0.7412(3) 0.0136(12) Uani 1 1 d . . . 
O11 O -0.4002(5) 0.8191(4) 0.6531(3) 0.0132(12) Uani 1 1 d . . . 
O12 O -0.5119(7) 1.0305(5) 0.6484(4) 0.0310(16) Uani 1 1 d . . . 
O13 O -0.5667(6) 0.6657(4) 0.6839(3) 0.0231(14) Uani 1 1 d . . . 
O14 O -0.6803(6) 0.8905(5) 0.6906(4) 0.0295(15) Uani 1 1 d . . . 
O15 O -0.2907(6) 0.6133(4) 0.6440(3) 0.0177(13) Uani 1 1 d . . . 
O16 O -0.1006(6) 0.8685(4) 0.8446(3) 0.0228(14) Uani 1 1 d . . . 
O17 O -0.5692(6) 0.9960(4) 0.7963(3) 0.0217(14) Uani 1 1 d . . . 
O18 O -0.3786(6) 0.9172(4) 0.8860(3) 0.0175(13) Uani 1 1 d . . . 
O19 O -0.4718(5) 0.7943(4) 0.7895(3) 0.0146(12) Uani 1 1 d . . . 
O20 O -0.2671(6) 0.7120(4) 0.8774(3) 0.0159(12) Uani 1 1 d . . . 
O21 O 0.2363(6) 0.8752(4) 0.8482(4) 0.0272(15) Uani 1 1 d . . . 
O22 O -0.3754(5) 0.6020(4) 0.7874(3) 0.0135(12) Uani 1 1 d . . . 
O23 O -0.1602(6) 0.5058(4) 0.8816(3) 0.0244(14) Uani 1 1 d . . . 
O24 O -0.5480(6) 0.7834(4) 0.9279(3) 0.0159(12) Uani 1 1 d . . . 
O25 O -0.4616(6) 0.5762(4) 0.9336(3) 0.0243(14) Uani 1 1 d . . . 
O26 O -0.6551(6) 0.6442(4) 0.8386(4) 0.0259(14) Uani 1 1 d . . . 
N1 N 0.2548(8) 0.3154(6) 0.9770(4) 0.0257(17) Uani 1 1 d D . . 
N2 N 0.3498(7) 0.2671(5) 0.7148(4) 0.0181(15) Uani 1 1 d . . . 
N3 N -0.1005(8) 0.7897(6) 0.4567(4) 0.0270(18) Uani 1 1 d D . . 
N4 N 0.0099(8) 0.7333(5) 0.1960(4) 0.0202(16) Uani 1 1 d . . . 
N5 N 0.3787(7) 0.7573(5) 0.0686(4) 0.0182(15) Uani 1 1 d . . . 
H5A H 0.3905 0.7640 0.0227 0.022 Uiso 1 1 calc R . . 
N6 N 0.2891(8) 0.8140(5) 0.3312(4) 0.0234(17) Uani 1 1 d . . . 
C1 C 0.2925(9) 0.2330(7) 0.9352(5) 0.024(2) Uani 1 1 d . . . 
H1 H 0.3075 0.1684 0.9561 0.028 Uiso 1 1 calc R . . 
C2 C 0.3091(8) 0.2437(7) 0.8615(5) 0.0197(18) Uani 1 1 d . . . 
H2 H 0.3345 0.1867 0.8326 0.024 Uiso 1 1 calc R . . 
C3 C 0.2869(8) 0.3421(6) 0.8308(4) 0.0166(17) Uani 1 1 d . . . 
C4 C 0.2425(9) 0.4257(7) 0.8768(5) 0.025(2) Uani 1 1 d . . . 
H4 H 0.2226 0.4911 0.8576 0.030 Uiso 1 1 calc R . . 
C5 C 0.2287(10) 0.4109(7) 0.9492(5) 0.025(2) Uani 1 1 d . . . 
H5 H 0.2014 0.4662 0.9796 0.030 Uiso 1 1 calc R . . 
C6 C 0.3088(9) 0.3542(6) 0.7517(5) 0.0185(18) Uani 1 1 d . . . 
C7 C 0.2901(9) 0.4506(7) 0.7192(5) 0.023(2) Uani 1 1 d . . . 
H7 H 0.2635 0.5091 0.7466 0.028 Uiso 1 1 calc R . . 
C8 C 0.3125(9) 0.4569(7) 0.6445(5) 0.024(2) Uani 1 1 d . . . 
H8 H 0.3014 0.5196 0.6208 0.029 Uiso 1 1 calc R . . 
C9 C 0.3512(9) 0.3677(7) 0.6074(5) 0.0226(19) Uani 1 1 d . . . 
C10 C 0.3724(8) 0.2734(7) 0.6437(5) 0.0196(18) Uani 1 1 d . . . 
H10 H 0.4028 0.2143 0.6176 0.024 Uiso 1 1 calc R . . 
C11 C -0.0502(9) 0.7051(7) 0.4159(5) 0.024(2) Uani 1 1 d . . . 
H11 H -0.0322 0.6414 0.4378 0.029 Uiso 1 1 calc R . . 
C12 C -0.0269(8) 0.7150(6) 0.3434(5) 0.0188(18) Uani 1 1 d . . . 
H12 H 0.0051 0.6578 0.3155 0.023 Uiso 1 1 calc R . . 
C13 C -0.0516(8) 0.8121(6) 0.3108(5) 0.0157(17) Uani 1 1 d . . . 
C14 C -0.1042(10) 0.8951(7) 0.3543(5) 0.026(2) Uani 1 1 d . . . 
H14 H -0.1227 0.9597 0.3338 0.031 Uiso 1 1 calc R . . 
C15 C -0.1292(10) 0.8828(7) 0.4269(5) 0.030(2) Uani 1 1 d . . . 
H15 H -0.1656 0.9385 0.4554 0.036 Uiso 1 1 calc R . . 
C16 C -0.0266(8) 0.8228(6) 0.2305(5) 0.0164(17) Uani 1 1 d . . . 
C17 C -0.0440(9) 0.9171(7) 0.1960(5) 0.024(2) Uani 1 1 d . . . 
H17 H -0.0720 0.9771 0.2215 0.029 Uiso 1 1 calc R . . 
C18 C -0.0181(10) 0.9184(7) 0.1225(5) 0.028(2) Uani 1 1 d . . . 
H18 H -0.0253 0.9801 0.0975 0.033 Uiso 1 1 calc R . . 
C19 C 0.0190(8) 0.8262(6) 0.0855(5) 0.0185(18) Uani 1 1 d . . . 
C20 C 0.0341(9) 0.7364(7) 0.1248(5) 0.0199(19) Uani 1 1 d . . . 
H20 H 0.0625 0.6754 0.1006 0.024 Uiso 1 1 calc R . . 
C21 C 0.3548(9) 0.8435(7) 0.1091(5) 0.025(2) Uani 1 1 d . . . 
H21 H 0.3520 0.9077 0.0876 0.030 Uiso 1 1 calc R . . 
C22 C 0.3348(9) 0.8331(6) 0.1836(5) 0.0190(18) Uani 1 1 d . . . 
H22 H 0.3199 0.8908 0.2126 0.023 Uiso 1 1 calc R . . 
C23 C 0.3371(8) 0.7368(6) 0.2144(5) 0.0186(18) Uani 1 1 d . . . 
C24 C 0.3634(8) 0.6519(6) 0.1698(5) 0.0196(18) Uani 1 1 d . . . 
H24 H 0.3667 0.5869 0.1899 0.024 Uiso 1 1 calc R . . 
C25 C 0.3848(9) 0.6625(6) 0.0962(5) 0.0206(19) Uani 1 1 d . . . 
H25 H 0.4028 0.6056 0.0666 0.025 Uiso 1 1 calc R . . 
C26 C 0.3136(8) 0.7258(6) 0.2935(4) 0.0177(18) Uani 1 1 d . . . 
C27 C 0.3205(9) 0.6327(7) 0.3262(5) 0.0220(19) Uani 1 1 d . . . 
H27 H 0.3393 0.5738 0.2987 0.026 Uiso 1 1 calc R . . 
C28 C 0.2998(10) 0.6251(7) 0.4004(5) 0.025(2) Uani 1 1 d . . . 
H28 H 0.3025 0.5621 0.4236 0.030 Uiso 1 1 calc R . . 
C29 C 0.2752(9) 0.7148(7) 0.4380(5) 0.0208(19) Uani 1 1 d . . . 
C30 C 0.2694(10) 0.8093(7) 0.4037(5) 0.029(2) Uani 1 1 d . . . 
H30 H 0.2521 0.8690 0.4304 0.035 Uiso 1 1 calc R . . 
Cl1 Cl 0.3721(3) 0.3680(2) 0.51367(13) 0.0371(6) Uani 1 1 d . . . 
Cl2 Cl 0.0510(3) 0.8239(2) -0.00663(13) 0.0361(6) Uani 1 1 d . . . 
Cl3 Cl 0.2485(3) 0.7127(2) 0.53209(14) 0.0456(7) Uani 1 1 d . . . 
H32 H 0.259(10) 0.307(7) 1.0304(10) 0.04(3) Uiso 1 1 d D . . 
H31 H -0.103(13) 0.781(9) 0.5102(10) 0.07(4) Uiso 1 1 d D . . 
 
loop_ 
 _atom_site_aniso_label 
 _atom_site_aniso_U_11 
 _atom_site_aniso_U_22 
 _atom_site_aniso_U_33 
 _atom_site_aniso_U_23 
 _atom_site_aniso_U_13 
 _atom_site_aniso_U_12 
Mo1 0.0197(4) 0.0099(3) 0.0107(4) 0.0002(3) -0.0013(3) -0.0025(3) 
Mo2 0.0208(4) 0.0133(3) 0.0133(4) -0.0005(3) 0.0020(3) 0.0015(3) 
Mo3 0.0219(4) 0.0121(3) 0.0133(4) 0.0012(3) 0.0023(3) -0.0020(3) 
Mo4 0.0181(4) 0.0120(3) 0.0124(4) 0.0012(3) -0.0004(3) 0.0015(3) 
Mo5 0.0207(4) 0.0132(3) 0.0190(4) -0.0015(3) 0.0035(3) 0.0012(3) 
Mo6 0.0169(4) 0.0102(3) 0.0122(4) -0.0009(3) -0.0026(3) -0.0025(3) 
Mo7 0.0183(4) 0.0114(3) 0.0142(4) 0.0006(3) 0.0029(3) -0.0021(3) 
Mo8 0.0192(4) 0.0135(3) 0.0187(4) 0.0024(3) -0.0025(3) 0.0023(3) 
Ag1 0.0658(6) 0.0553(5) 0.0693(7) -0.0041(5) -0.0237(5) -0.0165(5) 
O1 0.038(4) 0.020(3) 0.035(4) -0.007(3) 0.007(3) 0.003(3) 
O2 0.028(3) 0.020(3) 0.026(4) 0.003(3) 0.004(3) 0.003(3) 
O3 0.044(4) 0.022(3) 0.020(4) 0.007(3) 0.005(3) 0.005(3) 
O4 0.032(4) 0.019(3) 0.013(3) 0.000(2) 0.001(3) -0.002(3) 
O5 0.039(4) 0.026(3) 0.021(4) -0.005(3) 0.006(3) -0.001(3) 
O6 0.022(3) 0.025(3) 0.031(4) -0.002(3) 0.004(3) -0.008(3) 
O7 0.021(3) 0.024(3) 0.030(4) -0.004(3) -0.004(3) -0.002(3) 
O8 0.019(3) 0.012(3) 0.014(3) 0.002(2) 0.000(2) -0.002(2) 
O9 0.022(3) 0.013(3) 0.017(3) 0.002(2) -0.002(2) 0.004(2) 
O10 0.023(3) 0.008(2) 0.009(3) 0.002(2) -0.002(2) 0.004(2) 
O11 0.016(3) 0.011(2) 0.012(3) 0.002(2) -0.003(2) -0.002(2) 
O12 0.035(4) 0.026(3) 0.029(4) 0.005(3) 0.000(3) 0.005(3) 
O13 0.027(3) 0.018(3) 0.025(4) 0.000(3) -0.005(3) -0.003(3) 
O14 0.028(4) 0.027(3) 0.033(4) 0.001(3) -0.004(3) -0.001(3) 
O15 0.026(3) 0.016(3) 0.011(3) -0.001(2) 0.000(2) -0.001(3) 
O16 0.026(3) 0.022(3) 0.021(3) 0.004(3) -0.004(3) -0.005(3) 
O17 0.026(3) 0.011(3) 0.026(4) 0.000(2) 0.003(3) 0.003(3) 
O18 0.023(3) 0.007(2) 0.024(3) -0.001(2) -0.001(2) -0.005(2) 
O19 0.017(3) 0.009(2) 0.016(3) 0.000(2) 0.004(2) -0.001(2) 
O20 0.021(3) 0.013(3) 0.013(3) 0.002(2) -0.001(2) -0.001(2) 
O21 0.023(3) 0.026(3) 0.031(4) 0.000(3) -0.001(3) 0.000(3) 
O22 0.018(3) 0.009(2) 0.014(3) 0.000(2) -0.001(2) -0.003(2) 
O23 0.032(3) 0.018(3) 0.022(4) 0.003(2) 0.003(3) 0.001(3) 
O24 0.017(3) 0.016(3) 0.015(3) -0.003(2) 0.002(2) -0.004(2) 
O25 0.032(3) 0.016(3) 0.026(4) 0.005(3) 0.003(3) -0.007(3) 
O26 0.026(3) 0.022(3) 0.032(4) -0.001(3) 0.001(3) -0.010(3) 
N1 0.025(4) 0.033(4) 0.018(4) 0.000(3) 0.002(3) -0.002(3) 
N2 0.021(4) 0.020(3) 0.015(4) 0.004(3) -0.006(3) -0.005(3) 
N3 0.032(4) 0.036(4) 0.013(4) 0.004(3) 0.001(3) -0.003(4) 
N4 0.027(4) 0.016(3) 0.016(4) 0.001(3) -0.002(3) 0.002(3) 
N5 0.023(4) 0.023(4) 0.009(4) -0.002(3) 0.002(3) -0.004(3) 
N6 0.027(4) 0.018(4) 0.025(5) 0.000(3) 0.002(3) -0.006(3) 
C1 0.024(5) 0.024(4) 0.024(5) 0.007(4) -0.001(4) -0.005(4) 
C2 0.015(4) 0.024(4) 0.019(5) 0.005(4) -0.003(3) 0.000(4) 
C3 0.021(4) 0.018(4) 0.012(4) 0.003(3) -0.002(3) -0.007(4) 
C4 0.032(5) 0.022(4) 0.018(5) 0.008(4) -0.002(4) 0.006(4) 
C5 0.034(5) 0.023(4) 0.019(5) -0.004(4) 0.002(4) -0.006(4) 
C6 0.021(4) 0.020(4) 0.015(4) 0.004(3) -0.001(3) -0.005(4) 
C7 0.025(5) 0.022(4) 0.021(5) 0.001(4) 0.001(4) 0.000(4) 
C8 0.029(5) 0.023(4) 0.021(5) 0.004(4) -0.003(4) -0.004(4) 
C9 0.023(4) 0.029(5) 0.016(5) 0.003(4) 0.001(3) -0.005(4) 
C10 0.016(4) 0.026(4) 0.019(5) -0.003(4) -0.003(3) -0.007(4) 
C11 0.029(5) 0.025(5) 0.021(5) 0.006(4) -0.008(4) -0.011(4) 
C12 0.017(4) 0.022(4) 0.018(5) -0.002(4) -0.004(3) -0.005(4) 
C13 0.011(4) 0.019(4) 0.018(4) 0.002(3) 0.002(3) -0.006(3) 
C14 0.030(5) 0.019(4) 0.028(5) 0.000(4) 0.001(4) 0.001(4) 
C15 0.032(5) 0.030(5) 0.025(5) -0.003(4) 0.006(4) 0.006(4) 
C16 0.016(4) 0.021(4) 0.014(4) 0.004(3) -0.006(3) -0.008(3) 
C17 0.027(5) 0.023(5) 0.019(5) 0.004(4) 0.000(4) 0.002(4) 
C18 0.043(6) 0.024(5) 0.016(5) 0.009(4) -0.001(4) -0.001(4) 
C19 0.017(4) 0.024(4) 0.013(4) 0.001(3) -0.003(3) 0.000(4) 
C20 0.023(4) 0.023(4) 0.013(4) -0.001(3) -0.003(3) 0.003(4) 
C21 0.031(5) 0.017(4) 0.025(5) 0.002(4) -0.002(4) 0.001(4) 
C22 0.023(4) 0.014(4) 0.019(5) -0.003(3) 0.001(3) -0.001(4) 
C23 0.012(4) 0.025(4) 0.018(4) 0.001(4) -0.003(3) 0.001(4) 
C24 0.017(4) 0.017(4) 0.026(5) 0.002(3) 0.002(3) -0.006(3) 
C25 0.020(4) 0.018(4) 0.024(5) -0.009(4) 0.002(4) -0.001(4) 
C26 0.015(4) 0.024(4) 0.012(4) 0.002(3) -0.003(3) 0.004(4) 
C27 0.025(5) 0.021(4) 0.019(5) -0.005(4) -0.002(4) 0.003(4) 
C28 0.034(5) 0.020(4) 0.021(5) 0.006(4) -0.001(4) -0.004(4) 
C29 0.018(4) 0.031(5) 0.012(4) 0.006(4) -0.001(3) 0.001(4) 
C30 0.037(5) 0.028(5) 0.021(5) -0.003(4) 0.001(4) 0.002(4) 
Cl1 0.0466(15) 0.0503(15) 0.0136(12) 0.0038(10) -0.0001(10) -0.0040(13) 
Cl2 0.0476(15) 0.0465(15) 0.0135(12) 0.0049(10) 0.0015(10) -0.0056(12) 
Cl3 0.0542(17) 0.0634(18) 0.0174(13) 0.0073(12) 0.0045(12) -0.0058(15) 
 
_geom_special_details 
; 
 All esds (except the esd in the dihedral angle between two l.s. planes) 
 are estimated using the full covariance matrix.  The cell esds are taken 
 into account individually in the estimation of esds in distances, angles 
 and torsion angles; correlations between esds in cell parameters are only 
 used when they are defined by crystal symmetry.  An approximate (isotropic) 
 treatment of cell esds is used for estimating esds involving l.s. planes. 
; 
 
loop_ 
 _geom_bond_atom_site_label_1 
 _geom_bond_atom_site_label_2 
 _geom_bond_distance 
 _geom_bond_site_symmetry_2 
 _geom_bond_publ_flag 
Mo1 O16 1.686(6) . ? 
Mo1 O18 1.758(5) . ? 
Mo1 O8 1.953(5) . ? 
Mo1 O20 1.982(5) . ? 
Mo1 O10 2.144(5) . ? 
Mo1 O19 2.355(6) . ? 
Mo1 Mo3 3.1904(13) . ? 
Mo2 O2 1.696(7) . ? 
Mo2 O5 1.697(6) . ? 
Mo2 O9 1.925(6) . ? 
Mo2 O4 1.962(6) . ? 
Mo2 O15 2.241(6) . ? 
Mo2 O10 2.484(5) . ? 
Mo3 O6 1.680(6) . ? 
Mo3 O3 1.691(6) . ? 
Mo3 O4 1.917(6) . ? 
Mo3 O8 1.996(5) . ? 
Mo3 O10 2.335(5) . ? 
Mo3 O11 2.348(6) . ? 
Mo4 O7 1.702(6) . ? 
Mo4 O23 1.705(6) . ? 
Mo4 O9 1.890(6) . ? 
Mo4 O20 2.018(5) . ? 
Mo4 O10 2.316(5) . ? 
Mo4 O22 2.373(6) . ? 
Mo5 O1 1.683(6) . ? 
Mo5 O21 1.720(7) 1_455 ? 
Mo5 O17 1.910(6) . ? 
Mo5 O24 1.961(6) . ? 
Mo5 O18 2.269(6) . ? 
Mo5 O19 2.441(5) . ? 
Mo6 O13 1.655(6) . ? 
Mo6 O15 1.751(5) . ? 
Mo6 O11 1.934(5) . ? 
Mo6 O22 1.970(5) . ? 
Mo6 O19 2.155(5) . ? 
Mo6 O10 2.335(6) . ? 
Mo6 Mo7 3.1774(12) . ? 
Mo7 O25 1.700(6) . ? 
Mo7 O26 1.704(6) . ? 
Mo7 O24 1.929(5) . ? 
Mo7 O22 1.970(5) . ? 
Mo7 O19 2.262(5) . ? 
Mo7 O20 2.405(6) . ? 
Mo8 O12 1.694(6) . ? 
Mo8 O14 1.697(7) . ? 
Mo8 O17 1.908(6) . ? 
Mo8 O11 2.001(5) . ? 
Mo8 O8 2.340(6) . ? 
Mo8 O19 2.395(5) . ? 
Ag1 O21 2.368(7) . ? 
Ag1 O2 2.382(7) . ? 
O21 Mo5 1.720(7) 1_655 ? 
N1 C1 1.345(12) . ? 
N1 C5 1.354(11) . ? 
N1 H32 1.002(10) . ? 
N2 C10 1.332(11) . ? 
N2 C6 1.351(11) . ? 
N3 C15 1.343(12) . ? 
N3 C11 1.377(12) . ? 
N3 H31 1.001(10) . ? 
N4 C20 1.334(11) . ? 
N4 C16 1.349(10) . ? 
N5 C25 1.343(11) . ? 
N5 C21 1.362(11) . ? 
N5 H5A 0.8600 . ? 
N6 C26 1.355(11) . ? 
N6 C30 1.353(12) . ? 
C1 C2 1.380(12) . ? 
C1 H1 0.9300 . ? 
C2 C3 1.408(11) . ? 
C2 H2 0.9300 . ? 
C3 C4 1.413(12) . ? 
C3 C6 1.485(11) . ? 
C4 C5 1.361(12) . ? 
C4 H4 0.9300 . ? 
C5 H5 0.9300 . ? 
C6 C7 1.397(11) . ? 
C7 C8 1.398(12) . ? 
C7 H7 0.9300 . ? 
C8 C9 1.372(12) . ? 
C8 H8 0.9300 . ? 
C9 C10 1.407(12) . ? 
C9 Cl1 1.746(9) . ? 
C10 H10 0.9300 . ? 
C11 C12 1.363(12) . ? 
C11 H11 0.9300 . ? 
C12 C13 1.409(11) . ? 
C12 H12 0.9300 . ? 
C13 C14 1.394(12) . ? 
C13 C16 1.507(11) . ? 
C14 C15 1.370(13) . ? 
C14 H14 0.9300 . ? 
C15 H15 0.9300 . ? 
C16 C17 1.389(11) . ? 
C17 C18 1.378(12) . ? 
C17 H17 0.9300 . ? 
C18 C19 1.402(12) . ? 
C18 H18 0.9300 . ? 
C19 C20 1.381(11) . ? 
C19 Cl2 1.725(9) . ? 
C20 H20 0.9300 . ? 
C21 C22 1.398(12) . ? 
C21 H21 0.9300 . ? 
C22 C23 1.386(11) . ? 
C22 H22 0.9300 . ? 
C23 C24 1.393(12) . ? 
C23 C26 1.486(12) . ? 
C24 C25 1.382(12) . ? 
C24 H24 0.9300 . ? 
C25 H25 0.9300 . ? 
C26 C27 1.360(12) . ? 
C27 C28 1.389(12) . ? 
C27 H27 0.9300 . ? 
C28 C29 1.371(12) . ? 
C28 H28 0.9300 . ? 
C29 C30 1.391(12) . ? 
C29 Cl3 1.756(9) . ? 
C30 H30 0.9300 . ? 
 
loop_ 
 _geom_angle_atom_site_label_1 
 _geom_angle_atom_site_label_2 
 _geom_angle_atom_site_label_3 
 _geom_angle 
 _geom_angle_site_symmetry_1 
 _geom_angle_site_symmetry_3 
 _geom_angle_publ_flag 
O16 Mo1 O18 105.2(3) . . ? 
O16 Mo1 O8 101.4(3) . . ? 
O18 Mo1 O8 96.9(2) . . ? 
O16 Mo1 O20 100.4(3) . . ? 
O18 Mo1 O20 96.0(2) . . ? 
O8 Mo1 O20 150.8(2) . . ? 
O16 Mo1 O10 98.9(3) . . ? 
O18 Mo1 O10 155.8(2) . . ? 
O8 Mo1 O10 79.4(2) . . ? 
O20 Mo1 O10 78.1(2) . . ? 
O16 Mo1 O19 173.6(2) . . ? 
O18 Mo1 O19 81.1(2) . . ? 
O8 Mo1 O19 78.2(2) . . ? 
O20 Mo1 O19 78.0(2) . . ? 
O10 Mo1 O19 74.7(2) . . ? 
O16 Mo1 Mo3 89.2(2) . . ? 
O18 Mo1 Mo3 133.43(19) . . ? 
O8 Mo1 Mo3 36.57(15) . . ? 
O20 Mo1 Mo3 125.14(16) . . ? 
O10 Mo1 Mo3 47.03(14) . . ? 
O19 Mo1 Mo3 86.72(14) . . ? 
O2 Mo2 O5 105.4(3) . . ? 
O2 Mo2 O9 97.5(3) . . ? 
O5 Mo2 O9 103.9(3) . . ? 
O2 Mo2 O4 97.0(3) . . ? 
O5 Mo2 O4 102.9(3) . . ? 
O9 Mo2 O4 144.8(2) . . ? 
O2 Mo2 O15 160.7(2) . . ? 
O5 Mo2 O15 93.8(3) . . ? 
O9 Mo2 O15 78.3(2) . . ? 
O4 Mo2 O15 77.5(2) . . ? 
O2 Mo2 O10 91.2(2) . . ? 
O5 Mo2 O10 163.3(3) . . ? 
O9 Mo2 O10 74.05(19) . . ? 
O4 Mo2 O10 73.7(2) . . ? 
O15 Mo2 O10 69.50(19) . . ? 
O6 Mo3 O3 106.1(3) . . ? 
O6 Mo3 O4 102.0(3) . . ? 
O3 Mo3 O4 97.3(3) . . ? 
O6 Mo3 O8 97.5(3) . . ? 
O3 Mo3 O8 103.2(3) . . ? 
O4 Mo3 O8 146.5(2) . . ? 
O6 Mo3 O10 92.3(3) . . ? 
O3 Mo3 O10 161.6(3) . . ? 
O4 Mo3 O10 78.2(2) . . ? 
O8 Mo3 O10 74.04(19) . . ? 
O6 Mo3 O11 161.9(3) . . ? 
O3 Mo3 O11 90.6(3) . . ? 
O4 Mo3 O11 82.3(2) . . ? 
O8 Mo3 O11 71.4(2) . . ? 
O10 Mo3 O11 71.19(19) . . ? 
O6 Mo3 Mo1 83.4(2) . . ? 
O3 Mo3 Mo1 138.7(2) . . ? 
O4 Mo3 Mo1 120.36(18) . . ? 
O8 Mo3 Mo1 35.65(15) . . ? 
O10 Mo3 Mo1 42.21(13) . . ? 
O11 Mo3 Mo1 79.30(14) . . ? 
O7 Mo4 O23 105.0(3) . . ? 
O7 Mo4 O9 101.8(3) . . ? 
O23 Mo4 O9 104.3(3) . . ? 
O7 Mo4 O20 97.4(3) . . ? 
O23 Mo4 O20 96.3(2) . . ? 
O9 Mo4 O20 146.9(2) . . ? 
O7 Mo4 O10 93.0(3) . . ? 
O23 Mo4 O10 160.5(3) . . ? 
O9 Mo4 O10 78.9(2) . . ? 
O20 Mo4 O10 73.4(2) . . ? 
O7 Mo4 O22 161.8(2) . . ? 
O23 Mo4 O22 91.1(3) . . ? 
O9 Mo4 O22 82.1(2) . . ? 
O20 Mo4 O22 71.9(2) . . ? 
O10 Mo4 O22 70.11(19) . . ? 
O1 Mo5 O21 106.2(3) . 1_455 ? 
O1 Mo5 O17 104.0(3) . . ? 
O21 Mo5 O17 98.2(3) 1_455 . ? 
O1 Mo5 O24 101.2(3) . . ? 
O21 Mo5 O24 97.3(3) 1_455 . ? 
O17 Mo5 O24 145.3(2) . . ? 
O1 Mo5 O18 92.2(3) . . ? 
O21 Mo5 O18 161.5(2) 1_455 . ? 
O17 Mo5 O18 78.5(2) . . ? 
O24 Mo5 O18 77.0(2) . . ? 
O1 Mo5 O19 162.3(3) . . ? 
O21 Mo5 O19 91.3(2) 1_455 . ? 
O17 Mo5 O19 75.8(2) . . ? 
O24 Mo5 O19 72.9(2) . . ? 
O18 Mo5 O19 70.3(2) . . ? 
O13 Mo6 O15 105.9(3) . . ? 
O13 Mo6 O11 101.5(3) . . ? 
O15 Mo6 O11 98.1(2) . . ? 
O13 Mo6 O22 100.4(3) . . ? 
O15 Mo6 O22 95.2(2) . . ? 
O11 Mo6 O22 150.1(2) . . ? 
O13 Mo6 O19 97.8(3) . . ? 
O15 Mo6 O19 156.2(3) . . ? 
O11 Mo6 O19 79.5(2) . . ? 
O22 Mo6 O19 77.5(2) . . ? 
O13 Mo6 O10 172.6(2) . . ? 
O15 Mo6 O10 81.4(2) . . ? 
O11 Mo6 O10 78.7(2) . . ? 
O22 Mo6 O10 76.9(2) . . ? 
O19 Mo6 O10 74.9(2) . . ? 
O13 Mo6 Mo7 88.1(2) . . ? 
O15 Mo6 Mo7 131.49(18) . . ? 
O11 Mo6 Mo7 124.88(16) . . ? 
O22 Mo6 Mo7 36.26(14) . . ? 
O19 Mo6 Mo7 45.35(14) . . ? 
O10 Mo6 Mo7 85.81(13) . . ? 
O25 Mo7 O26 105.4(3) . . ? 
O25 Mo7 O24 98.6(3) . . ? 
O26 Mo7 O24 102.4(3) . . ? 
O25 Mo7 O22 100.5(2) . . ? 
O26 Mo7 O22 98.6(3) . . ? 
O24 Mo7 O22 146.6(2) . . ? 
O25 Mo7 O19 160.3(3) . . ? 
O26 Mo7 O19 94.3(3) . . ? 
O24 Mo7 O19 77.8(2) . . ? 
O22 Mo7 O19 75.0(2) . . ? 
O25 Mo7 O20 88.4(3) . . ? 
O26 Mo7 O20 164.7(3) . . ? 
O24 Mo7 O20 81.5(2) . . ? 
O22 Mo7 O20 71.9(2) . . ? 
O19 Mo7 O20 72.0(2) . . ? 
O25 Mo7 Mo6 136.7(2) . . ? 
O26 Mo7 Mo6 85.1(2) . . ? 
O24 Mo7 Mo6 120.45(17) . . ? 
O22 Mo7 Mo6 36.25(15) . . ? 
O19 Mo7 Mo6 42.67(14) . . ? 
O20 Mo7 Mo6 80.30(14) . . ? 
O12 Mo8 O14 105.6(3) . . ? 
O12 Mo8 O17 102.8(3) . . ? 
O14 Mo8 O17 100.7(3) . . ? 
O12 Mo8 O11 101.0(3) . . ? 
O14 Mo8 O11 97.6(3) . . ? 
O17 Mo8 O11 144.6(2) . . ? 
O12 Mo8 O8 92.5(3) . . ? 
O14 Mo8 O8 160.5(2) . . ? 
O17 Mo8 O8 81.7(2) . . ? 
O11 Mo8 O8 71.4(2) . . ? 
O12 Mo8 O19 163.0(3) . . ? 
O14 Mo8 O19 91.0(3) . . ? 
O17 Mo8 O19 77.0(2) . . ? 
O11 Mo8 O19 72.59(19) . . ? 
O8 Mo8 O19 70.55(19) . . ? 
O21 Ag1 O2 177.5(2) . . ? 
Mo2 O2 Ag1 139.0(3) . . ? 
Mo3 O4 Mo2 116.0(3) . . ? 
Mo1 O8 Mo3 107.8(2) . . ? 
Mo1 O8 Mo8 111.6(2) . . ? 
Mo3 O8 Mo8 104.3(3) . . ? 
Mo4 O9 Mo2 116.0(3) . . ? 
Mo1 O10 Mo4 93.1(2) . . ? 
Mo1 O10 Mo3 90.76(18) . . ? 
Mo4 O10 Mo3 160.3(3) . . ? 
Mo1 O10 Mo6 105.7(2) . . ? 
Mo4 O10 Mo6 100.0(2) . . ? 
Mo3 O10 Mo6 97.5(2) . . ? 
Mo1 O10 Mo2 163.4(3) . . ? 
Mo4 O10 Mo2 84.71(15) . . ? 
Mo3 O10 Mo2 86.10(17) . . ? 
Mo6 O10 Mo2 90.90(19) . . ? 
Mo6 O11 Mo8 110.3(2) . . ? 
Mo6 O11 Mo3 109.7(2) . . ? 
Mo8 O11 Mo3 103.9(2) . . ? 
Mo6 O15 Mo2 118.2(3) . . ? 
Mo8 O17 Mo5 116.5(3) . . ? 
Mo1 O18 Mo5 116.8(3) . . ? 
Mo6 O19 Mo7 91.99(19) . . ? 
Mo6 O19 Mo1 104.6(2) . . ? 
Mo7 O19 Mo1 100.3(2) . . ? 
Mo6 O19 Mo8 90.3(2) . . ? 
Mo7 O19 Mo8 161.3(3) . . ? 
Mo1 O19 Mo8 97.01(19) . . ? 
Mo6 O19 Mo5 163.4(3) . . ? 
Mo7 O19 Mo5 88.24(18) . . ? 
Mo1 O19 Mo5 91.7(2) . . ? 
Mo8 O19 Mo5 84.35(16) . . ? 
Mo1 O20 Mo4 108.2(2) . . ? 
Mo1 O20 Mo7 107.5(2) . . ? 
Mo4 O20 Mo7 103.1(2) . . ? 
Mo5 O21 Ag1 137.6(3) 1_655 . ? 
Mo7 O22 Mo6 107.5(2) . . ? 
Mo7 O22 Mo4 105.8(2) . . ? 
Mo6 O22 Mo4 109.9(2) . . ? 
Mo7 O24 Mo5 114.7(3) . . ? 
C1 N1 C5 122.2(8) . . ? 
C1 N1 H32 118(6) . . ? 
C5 N1 H32 119(6) . . ? 
C10 N2 C6 118.3(7) . . ? 
C15 N3 C11 121.8(8) . . ? 
C15 N3 H31 121(7) . . ? 
C11 N3 H31 117(7) . . ? 
C20 N4 C16 117.7(7) . . ? 
C25 N5 C21 123.7(8) . . ? 
C25 N5 H5A 118.1 . . ? 
C21 N5 H5A 118.1 . . ? 
C26 N6 C30 118.9(8) . . ? 
N1 C1 C2 120.4(8) . . ? 
N1 C1 H1 119.8 . . ? 
C2 C1 H1 119.8 . . ? 
C1 C2 C3 119.0(8) . . ? 
C1 C2 H2 120.5 . . ? 
C3 C2 H2 120.5 . . ? 
C4 C3 C2 118.3(8) . . ? 
C4 C3 C6 122.4(7) . . ? 
C2 C3 C6 119.2(8) . . ? 
C5 C4 C3 120.1(8) . . ? 
C5 C4 H4 120.0 . . ? 
C3 C4 H4 120.0 . . ? 
N1 C5 C4 119.9(8) . . ? 
N1 C5 H5 120.1 . . ? 
C4 C5 H5 120.1 . . ? 
N2 C6 C7 123.3(8) . . ? 
N2 C6 C3 115.6(7) . . ? 
C7 C6 C3 121.1(8) . . ? 
C8 C7 C6 118.3(8) . . ? 
C8 C7 H7 120.9 . . ? 
C6 C7 H7 120.9 . . ? 
C9 C8 C7 117.9(8) . . ? 
C9 C8 H8 121.0 . . ? 
C7 C8 H8 121.0 . . ? 
C8 C9 C10 120.9(8) . . ? 
C8 C9 Cl1 120.9(7) . . ? 
C10 C9 Cl1 118.2(7) . . ? 
N2 C10 C9 121.2(8) . . ? 
N2 C10 H10 119.4 . . ? 
C9 C10 H10 119.4 . . ? 
C12 C11 N3 119.8(8) . . ? 
C12 C11 H11 120.1 . . ? 
N3 C11 H11 120.1 . . ? 
C11 C12 C13 119.8(8) . . ? 
C11 C12 H12 120.1 . . ? 
C13 C12 H12 120.1 . . ? 
C14 C13 C12 118.1(8) . . ? 
C14 C13 C16 122.1(8) . . ? 
C12 C13 C16 119.7(8) . . ? 
C15 C14 C13 120.9(8) . . ? 
C15 C14 H14 119.5 . . ? 
C13 C14 H14 119.5 . . ? 
N3 C15 C14 119.5(9) . . ? 
N3 C15 H15 120.3 . . ? 
C14 C15 H15 120.3 . . ? 
N4 C16 C17 123.8(8) . . ? 
N4 C16 C13 114.1(7) . . ? 
C17 C16 C13 122.0(8) . . ? 
C18 C17 C16 117.4(8) . . ? 
C18 C17 H17 121.3 . . ? 
C16 C17 H17 121.3 . . ? 
C17 C18 C19 119.7(8) . . ? 
C17 C18 H18 120.1 . . ? 
C19 C18 H18 120.1 . . ? 
C20 C19 C18 118.4(8) . . ? 
C20 C19 Cl2 120.2(7) . . ? 
C18 C19 Cl2 121.3(7) . . ? 
N4 C20 C19 122.9(8) . . ? 
N4 C20 H20 118.5 . . ? 
C19 C20 H20 118.5 . . ? 
N5 C21 C22 118.4(8) . . ? 
N5 C21 H21 120.8 . . ? 
C22 C21 H21 120.8 . . ? 
C23 C22 C21 119.9(8) . . ? 
C23 C22 H22 120.0 . . ? 
C21 C22 H22 120.0 . . ? 
C22 C23 C24 118.6(8) . . ? 
C22 C23 C26 120.0(8) . . ? 
C24 C23 C26 121.4(8) . . ? 
C25 C24 C23 121.2(8) . . ? 
C25 C24 H24 119.4 . . ? 
C23 C24 H24 119.4 . . ? 
N5 C25 C24 118.1(8) . . ? 
N5 C25 H25 120.9 . . ? 
C24 C25 H25 120.9 . . ? 
N6 C26 C27 122.2(8) . . ? 
N6 C26 C23 115.9(7) . . ? 
C27 C26 C23 121.9(8) . . ? 
C26 C27 C28 120.4(8) . . ? 
C26 C27 H27 119.8 . . ? 
C28 C27 H27 119.8 . . ? 
C29 C28 C27 116.9(8) . . ? 
C29 C28 H28 121.5 . . ? 
C27 C28 H28 121.5 . . ? 
C28 C29 C30 121.8(8) . . ? 
C28 C29 Cl3 120.1(7) . . ? 
C30 C29 Cl3 118.0(7) . . ? 
N6 C30 C29 119.7(9) . . ? 
N6 C30 H30 120.1 . . ? 
C29 C30 H30 120.1 . . ? 
 
_diffrn_measured_fraction_theta_max    0.927 
_diffrn_reflns_theta_full              27.48 
_diffrn_measured_fraction_theta_full   0.927 
_refine_diff_density_max    1.145 
_refine_diff_density_min   -3.754 
_refine_diff_density_rms    0.224 
